# Supplementary material
Source: PubMed Central journal article supplement (PMC6169032)
Supplement: DS_10.1177_0022034518782189.pdf [file DS_10.1177_0022034518782189.pdf]

## Family History of MI, Smoking, and Risk of Periodontal Disease

Y.H. Yu, L. Doucette-Stamm, J. Rogus, K. Moss, R.Y.L. Zee, B. Steffensen, P.M. Ridker, J.E. Buring, S. Offenbacher, K. Kornman, and D.I. Chasman

### Appendix

**Appendix Table 1. Association between CDC/AAP Definition of Severe Periodontitis by Family History of MI and Smoking from the Dental ARIC Study**

|                | <b>Group 1</b><br><b>Fam Hx MI ( - )</b><br><b>Smoker ( - )</b> | <b>Group 2</b><br><b>Fam Hx MI ( + )</b><br><b>Smoker ( - )</b> | <b>Group 3</b><br><b>Fam Hx MI ( - )</b><br><b>Smoker ( + )</b> | <b>Group 4</b><br><b>Fam Hx MI ( + )</b><br><b>Smoker ( + )</b> |
|----------------|-----------------------------------------------------------------|-----------------------------------------------------------------|-----------------------------------------------------------------|-----------------------------------------------------------------|
|                |                                                                 | Odds Ratio (95% CI)                                             | Odds Ratio (95% CI)                                             | Odds Ratio (95% CI)                                             |
| <b>Model 1</b> | <b>Ref.</b>                                                     | 1.02 (0.88-1.18)                                                | <b>2.61 (2.12-3.22)</b>                                         | <b>2.54 (1.97-3.28)</b>                                         |
| <b>Model 2</b> | <b>Ref.</b>                                                     | 1.07 (0.92-1.25)                                                | <b>2.89 (2.31-3.62)</b>                                         | <b>3.13 (2.39-4.10)</b>                                         |
| <b>Model 3</b> | <b>Ref.</b>                                                     | 1.06 (0.91-1.24)                                                | <b>2.73 (2.17-3.44)</b>                                         | <b>3.02 (2.29 -3.99)</b>                                        |

Model 1 = Unadjusted logistic regression

Model 2 = adjusted for: age, race/center, gender, diabetes, and BMI

Model 3 = adjusted for: age, race/center, gender, diabetes, BMI, education (3-levels) and income (3-levels)

**Appendix Table 2. Risk of Ever-Having Periodontal Disease Using Multi-variate Logistic Regression Model in the WGHS**

|                                                 | <b>Odds Ratio (95% CI)</b> | <b>P-value</b>   |
|-------------------------------------------------|----------------------------|------------------|
| <b>Group 1</b><br>Fam Hx MI ( - ) /Smoker ( - ) | Ref.                       | Ref.             |
| <b>Group 2</b><br>Fam Hx MI ( + ) /Smoker ( - ) | <i>1.22 (1.05-1.42)</i>    | <i>0.009</i>     |
| <b>Group 3</b><br>Fam Hx MI ( - ) /Smoker ( + ) | <i>1.91 (1.77-2.06)</i>    | <i>&lt;2e-16</i> |
| <b>Group 4</b><br>Fam Hx MI ( + ) /Smoker ( + ) | <i>2.11 (1.84-2.41)</i>    | <i>&lt;2e-16</i> |
| Age                                             | <i>1.03 (1.02-1.03)</i>    | <i>&lt;2e-16</i> |
| BMI                                             | 1.00 (1.00-1.01)           | 0.7              |
| Bachelor's degree                               | <i>1.19 (1.10-1.27)</i>    | <i>3.32e-06</i>  |
| Income                                          | <i>1.04 (1.02-1.07)</i>    | <i>0.002</i>     |
| Incd Diabetes                                   | 1.07 (0.93-1.24)           | 0.325            |
| HRT                                             | 1.07 (0.99-1.15)           | 0.097            |
| CRP (mg/L) †                                    | <i>0.96 (0.92-1.00)</i>    | <i>0.049</i>     |
| HDL (mg/dL) †                                   | 0.98 (0.95-1.02)           | 0.349            |
| LDL (mg/dL) †                                   | <i>1.08 (1.04-1.11)</i>    | <i>2.86e-05</i>  |
| ICAM (ng/ml) †                                  | <i>1.09 (1.05-1.13)</i>    | <i>2.04e-06</i>  |
| Fibrinogen (mg/dL) †                            | <i>1.06 (1.02-1.10)</i>    | <i>0.003</i>     |

† Standardized serum levels. 1 SD increase.

Abbreviation: BMI, body-mass index; Fam Hx, family history; MI, myocardial infarction; Incd, incident; HRT, hormone replacement therapy; HDL, high-density lipoproteins; LDL, low-density lipoproteins; CRP, C-reactive protein (natural logarithm transformed); ICAM, intercellular adhesion molecule 1.
